# Supplementary material for: Profiles of Volatile Biomarkers Detect Tuberculosis from Skin
Source: Research Square preprint supplement (doi:10.21203/rs.3.rs-119729/v1), 2020-12-10
Supplement: Supplementary file 3 [file 13eb13f8ff4eccf6249a4748.xlsx]

## Sheet: SA
'RT (min)'	'Percentage'	ACTIVE_TENAX_ARM63_SPL558_mod'	'ACTIVE_TENAX_ARM_101_SPL560_mod'	'ACTIVE_TENAX_ARM_104_SPG94_mod'	'ACTIVE_TENAX_ARM_106_SPG89_mod'	'ACTIVE_TENAX_ARM_109_SPG92_mod'	'ACTIVE_TENAX_ARM_114_SPG137_mod'	'ACTIVE_TENAX_ARM_114_SPG86_mod'	'ACTIVE_TENAX_ARM_116_SPL563_mod'	'ACTIVE_TENAX_ARM_117_SPL562_mod'	'ACTIVE_TENAX_ARM_122_SPG95_mod'	'ACTIVE_TENAX_ARM_136_SPG98_mod'	'ACTIVE_TENAX_ARM_137_SPG96_mod'	'ACTIVE_TENAX_ARM_138_SPG93_mod'	'ACTIVE_TENAX_ARM_146_SPG99_mod'	'ACTIVE_TENAX_ARM_14_SPG077_21.8_mod'	'ACTIVE_TENAX_ARM_151_SPL567_mod'	'ACTIVE_TENAX_ARM_159_SPG100_mod'	'ACTIVE_TENAX_ARM_167_SPG97_mod'	'ACTIVE_TENAX_ARM_170_SPL566_mod'	'ACTIVE_TENAX_ARM_181_SPG102_mod'	'ACTIVE_TENAX_ARM_196_SPL571_mod'	'ACTIVE_TENAX_ARM_197_SPG112_mod'	ACTIVE_TENAX_ARM_1_SPG082_mod'	'ACTIVE_TENAX_ARM_207_SPG116_mod'	'ACTIVE_TENAX_ARM_20_SPG078_mod'	'ACTIVE_TENAX_ARM_215_SPL570_mod'	'ACTIVE_TENAX_ARM_218_SPL568_mod'	'ACTIVE_TENAX_ARM_225_SPG106_mod'	'ACTIVE_TENAX_ARM_232_SPG111_mod'	'ACTIVE_TENAX_ARM_244_SPG105_mod'	'ACTIVE_TENAX_ARM_247_SPG110_mod'	'ACTIVE_TENAX_ARM_24_SPL556_mod'	'ACTIVE_TENAX_ARM_260_SPG115_mod'	'ACTIVE_TENAX_ARM_261_SPG109_mod'	'ACTIVE_TENAX_ARM_262_SPG108_mod'	ACTIVE_TENAX_ARM_26_SPG076_mod'	'ACTIVE_TENAX_ARM_279_SPG107_mod'	'ACTIVE_TENAX_ARM_289_SPG103_mod'	'ACTIVE_TENAX_ARM_28_SPG080_22.8_mod'	'ACTIVE_TENAX_ARM_291_SPG104_mod'	'ACTIVE_TENAX_ARM_299_SPG117_mod'	'ACTIVE_TENAX_ARM_301_SPG146_mod'	'ACTIVE_TENAX_ARM_307_SPL583_mod'	'ACTIVE_TENAX_ARM_311_SPG132_mod'	'ACTIVE_TENAX_ARM_312_SPL582_mod'	'ACTIVE_TENAX_ARM_313_SPL581_mod'	'ACTIVE_TENAX_ARM_319_SPG150_mod'	'ACTIVE_TENAX_ARM_322_SPG139_mod'
3.23	85.4749	26.6454	78.5042	3.70529	28.5195	10.6249	22.1221	16.9924	32.8993	100.458	1.03639	5.46893	0.363719	NaN	2.95094	36.1489	0.696056	25.6963	2.28073	NaN	13.7386	2.22082	3.65631	5.43925	9.34187	NaN	15.2978	39.4719	0.432667	21.1371	NaN	9.82931	NaN	14.775	1.11973	10.8127	4.7993	18.6622	0.43329	14.2981	9.84131	13.3759	8.47472	47.8998	8.42521	49.602	40.3226	35.0237	10.9145
3.34	90.5028	8.26261	14.1605	0.3193	6.06123	14.051	16.6599	3.94049	17.6217	4.07841	1.95187	0.341306	1.51186	1.83263	1.33775	5.06993	2.32489	12.7151	1.2347	2.44716	4.17184	1.7156	1.64878	3.9264	3.45759	NaN	7.04583	13.3544	1.97423	5.81369	1.0385	3.19902	3.16282	10.5664	3.7803	3.48715	4.52655	3.54821	2.77356	2.3704	6.04246	6.34976	6.20891	4.84911	5.85368	4.03145	8.54365	2.76867	12.4572
8.505	93.2961	11.0618	21.8866	1.04498	9.58083	6.11288	24.4435	7.14081	18.586	51.6055	0.369476	4.72183	0.147117	NaN	2.97452	1.8474	0.389597	35.4947	0.126198	0.70398	8.49376	1.47667	25.1594	2.28726	6.60937	1.21812	26.29	42.2633	5.46692	30.8116	0.230957	9.57574	0.722154	51.4635	1.3163	17.5816	1.48418	33.9746	14.6528	1.82111	10.8881	15.6557	22.8003	23.322	2.93191	20.4423	17.9369	17.4871	15.1691
13.755	94.4134	2.63298	9.46627	1.65433	5.01336	4.74732	11.7775	7.5652	7.98349	9.50491	2.93564	3.12921	1.4791	4.27833	9.90565	2.79756	1.74332	25.8676	1.22042	1.09823	2.76389	4.00758	1.97856	0.550023	2.66554	NaN	6.80987	17.2614	1.06369	6.7892	4.75851	9.51849	NaN	6.63263	5.86929	3.63618	1.62031	5.14678	5.04468	2.86939	3.27936	2.65074	13.2571	13.7872	4.42732	8.09184	10.0647	8.35339	8.89742
14.855	92.7374	2.68002	4.56251	3.47139	2.10089	1.75634	5.10589	2.52485	5.04043	6.01103	10.0586	6.5857	5.39895	5.24781	8.43724	0.8982	2.7006	14.5988	2.00728	3.83393	2.36705	3.96364	1.60204	1.39352	2.1424	NaN	3.74784	5.22559	1.332	2.27817	5.38629	6.53628	NaN	NaN	8.06611	3.6015	1.54789	3.66468	4.62332	1.337	3.53054	3.05193	3.88944	5.09589	14.7383	3.6748	3.95732	22.4623	5.7317
15.62	97.7654	24.5331	55.0001	15.7761	35.8153	8.48976	27.7427	54.7386	33.7676	9.92543	36.0105	15.9558	28.1134	16.0468	11.4646	1.43104	7.08723	3.38741	27.9179	22.2536	40.2123	13.6775	4.51203	8.73542	10.4734	0.500946	15.5995	76.2128	9.67664	16.2506	23.176	13.9386	2.09854	15.8115	25.6038	22.8063	6.89173	12.3946	36.2101	2.83147	29.2501	15.3193	18.858	9.92941	11.4842	14.9691	10.1669	7.62596	26.4862
15.92	93.2961	1.89775	2.26943	1.25807	1.73334	0.991463	2.65872	2.33094	2.23245	1.49568	2.50665	3.22678	2.46054	3.4722	1.72906	3.09939	1.79873	4.32963	1.44398	2.24939	2.54502	4.85706	2.24258	1.17834	5.08835	NaN	4.03127	4.2667	0.958105	2.58998	2.46252	4.16387	0.398161	4.30819	2.26494	2.37781	0.753007	3.60182	3.0001	1.1771	3.32664	3.19591	2.17689	2.59537	2.1415	2.05054	1.83435	2.51022	3.61829
16.075	80.4469	0.617656	1.42159	1.17888	0.390083	0.556822	2.86141	0.544236	1.515	1.33876	1.74891	2.57539	0.839034	1.63762	2.90445	NaN	1.56913	10.7594	0.687889	0.877813	0.653119	1.29849	0.551536	0.310633	0.418835	NaN	1.65532	3.81996	0.528836	1.2622	1.11136	2.49578	NaN	2.75761	1.45114	3.25809	NaN	0.911277	0.836338	NaN	1.16619	0.928726	1.7116	2.67607	3.26581	2.92461	2.41167	2.56924	2.96564
16.81	89.9441	89.9441	2.37466	2.75995	1.23578	1.41071	2.80064	6.91345	1.95374	1.9741	1.85681	6.18587	3.83258	2.87727	2.62556	2.2814	NaN	0.979596	3.38741	1.65969	4.65189	1.68275	2.1964	0.581822	1.01119	1.04723	NaN	2.71787	3.13734	0.836992	1.90469	2.75377	1.48602	NaN	2.50805	6.08035	2.87159	0.90463	1.48432	7.54684	NaN	2.77951	4.04318	2.47715	1.53565	4.51772	3.4633	2.46551	12.4033
18.265	96.648	14.0316	48.6401	9.48743	22.9149	5.76215	52.5768	42.7597	25.2788	6.21598	16.6554	7.29272	21.5923	10.7831	4.55027	2.77024	2.9553	10.526	13.488	14.7584	25.9183	12.0534	3.11928	6.66649	11.9104	NaN	14.4768	65.9609	7.49118	14.1773	12.1354	9.88156	1.80176	13.8115	18.602	15.131	3.20678	11.0639	29.3936	2.74515	24.7069	13.2164	12.5852	7.61684	6.39728	16.412	10.4054	7.25683	19.3715
18.805	80.4469	0.182898	0.551059	0.448642	0.531561	0.281929	6.3431	0.326632	0.517924	0.845266	0.458857	0.505382	0.52766	0.508495	0.889798	0	0.164877	1.90879	0.311244	0.544761	0.442613	0.565789	0.317269	0.386141	0.311734	NaN	0.366382	1.06988	0.216319	0.399516	0.496768	0.967925	NaN	NaN	0.508372	0.339356	NaN	0.371224	0.592285	NaN	1.1094	0.504599	1.31082	1.9293	14.2648	1.9735	2.62431	3.1798	17.4637
19.075	89.9441	0.54526	1.28482	4.49657	2.13638	1.4206	5.88532	0.680533	2.41009	3.55233	6.35046	5.74439	4.32623	4.59057	3.70579	1.22088	5.40493	7.03254	2.93669	3.83907	1.07006	5.31749	2.63339	9.37409	0.519167	NaN	1.08005	9.48592	0.473936	26.0575	3.91941	3.4438	NaN	2.85782	27.7002	2.47354	8.42584	1.59772	1.03535	NaN	0.504099	1.66771	1.20587	3.69909	5.50444	22.6904	1.79666	3.9507	6.05386
20.405	88.8268	0.44794	0.724415	1.30838	0.667897	0.707804	2.69429	1.68385	0.823432	1.22145	2.7041	1.95589	1.48103	13.2467	0.660044	5.61927	0.964697	2.36238	0.915372	1.28396	2.05042	1.9005	0.66251	0.555508	6.48362	NaN	11.1986	4.48082	0.980719	5.94854	1.86192	1.894	NaN	13.1572	2.10086	1.52243	NaN	1.60773	2.50966	NaN	1.36667	1.48183	0.707181	1.27225	2.22307	4.91556	0.597019	0.72424	3.03009
20.67	90.5028	0.99006	0.389024	2.06969	1.30428	0.176543	7.44354	0.907813	2.31444	1.44368	3.66449	3.6935	1.09651	1.87685	1.86777	0.879827	1.9228	3.28443	1.21212	0.689512	0.875284	1.33921	0.736516	0.578894	0.529369	NaN	0.598383	4.43515	0.0747944	0.872106	0.294299	1.51575	NaN	1.62708	0.255661	0.903067	NaN	1.09016	0.110902	NaN	0.758677	1.10246	4.1218	4.32465	3.32286	3.50386	5.25158	2.92713	6.46535
21.895	80.4469	11.21	23.9279	13.0483	6.02759	1.09437	77.7846	4.06365	5.62232	2.67067	18.0455	NaN	21.1476	NaN	NaN	NaN	NaN	NaN	6.52658	28.6854	10.0578	NaN	NaN	1.77584	5.93356	NaN	8.54022	84.6186	5.15807	44.3645	NaN	16.3047	NaN	13.0224	14.9949	2.66934	0.683856	1.99237	14.6868	NaN	54.7546	5.27308	3.1391	3.58117	5.61385	4.31556	14.3437	5.31785	46.4096
22.605	92.1788	1.80825	1.0575	8.51206	4.83643	21.2459	16.7759	1.44214	9.23797	10.2813	15.0364	3.37966	6.09892	3.29739	2.1454	1.90123	14.6119	2.95673	11.1065	9.74393	3.92648	7.99126	2.05392	62.2699	1.47437	NaN	3.87382	25.4325	0.851647	171.396	4.66457	3.04097	54.533	NaN	52.4508	1.88009	39.0719	5.66171	6.84219	NaN	NaN	4.02418	1.48162	15.7479	16.8315	106.289	0.638316	4.0131	16.2969
23.735	91.6201	1.20022	1.60341	2.96462	2.68483	3.48693	11.5804	3.98424	3.32852	1.96033	3.542	3.22552	3.05095	5.83087	1.41178	0.949558	2.57448	1.67993	4.25757	4.68869	7.80089	5.05677	2.16789	3.30466	32.1388	NaN	7.37192	7.76455	0.997454	20.2148	1.9502	2.67633	2.7926	2.64048	6.35482	2.26521	NaN	2.43449	5.17396	NaN	4.46706	2.04001	1.72565	1.56951	3.98121	14.1744	1.36204	1.3908	10.4159
24.54	88.8268	4.74707	3.32766	13.203	8.31258	36.3947	19.3144	6.4354	16.8237	9.84136	22.703	5.92534	9.28333	8.05119	4.68959	NaN	23.3436	6.18607	21.1548	12.5758	10.5115	13.1565	3.72867	NaN	3.4898	NaN	5.99887	57.5548	3.34441	141.359	8.61338	9.17342	NaN	51.9239	35.078	4.95485	NaN	7.75533	16.9757	NaN	2.48994	8.43268	5.71099	21.4428	24.0105	143.538	3.27374	6.07163	26.8069
25.575	83.2402	11.537	8.4914	7.07783	30.2165	NaN	23.5886	16.4526	15.6639	4.26508	7.72536	5.50856	21.0344	14.6634	NaN	NaN	NaN	3.01059	20.7542	60.2476	10.0502	11.6593	NaN	5.50159	36.415	NaN	3.14606	91.6132	1.13716	9.08305	NaN	10.176	NaN	NaN	2.13903	1.3018	NaN	1.89681	30.5291	NaN	29.3548	4.03257	6.80033	NaN	8.03113	2.49089	6.65488	3.10724	22.3273
25.83	90.5028	1.3696	0.685923	3.57805	2.67662	6.10688	6.59555	1.78457	4.69231	1.04539	6.87388	1.55219	3.08176	3.80698	1.54382	NaN	8.75216	1.52896	11.0387	0.455412	4.76284	3.31239	0.601863	9.22272	2.35343	2.35343	1.15187	NaN	0.856913	32.8983	2.11045	0.731392	7.61986	4.91379	8.52346	0.596946	5.02065	0.743438	4.29671	1.88907	2.31341	2.80443	2.57124	5.882	6.45663	60.325	0.4381	2.23951	6.0474
26.335	96.648	4.09978	1.69789	8.64755	9.077	26.2203	21.894	7.88198	17.002	4.54448	24.5402	2.6406	7.7041	3.0243	4.03898	NaN	20.5938	2.46098	21.3335	13.4401	15.7329	8.58195	1.23072	40.6607	NaN	NaN	2.26662	48.5571	2.90925	117.912	6.2313	3.8005	40.3588	16.4468	32.3597	5.01767	27.7386	5.0375	15.1572	9.89367	1.55328	8.63257	4.9427	12.8973	22.4526	133.534	1.32395	2.5569	23.4416
27.81	91.0615	2.69898	4.43237	5.08974	12.4951	4.34986	4.87541	5.59623	28.0541	2.22011	0.642918	9.78905	17.0458	257.701	7.87937	25.9058	37.4724	1.82465	65.2969	42.6798	273.321	40.8589	6.07062	120.392	20.4676	NaN	200.18	303.218	26.173	359.149	20.4379	114.9	381.493	133.679	105.652	7.54491	1.33458	5.58995	11.6809	28.2855	16.9999	7.60295	9.84282	6.82246	14.3515	336.303	3.0095	5.89542	225.835
28.075	94.4134	4.34115	3.98702	8.6183	7.82803	22.0456	26.318	5.40809	24.0098	4.189	29.4772	3.08604	11.144	1.42996	5.12204	8.82293	32.6449	3.11414	44.1279	12.769	16.6515	8.78393	1.56613	30.6979	NaN	NaN	4.66868	69.3299	3.94742	92.4796	6.8361	3.44181	9.44283	24.7281	36.0761	7.34975	24.2744	8.19577	13.226	14.0806	2.19551	9.5702	7.82269	11.6439	34.5751	121.057	1.69131	4.35809	39.1389
28.4	88.8268	10.4442	4.01099	2.87408	38.8744	NaN	40.6331	17.0827	30.498	5.26382	7.05222	2.40417	22.6346	28.0377	1.92432	2.47396	1.66868	NaN	63.4438	98.6249	27.3769	25.1731	NaN	2.94467	112.05	1.48681	3.27273	140.718	1.58523	16.2562	1.17118	10.839	10.8637	NaN	3.68131	1.27803	1.35746	3.37291	55.4949	NaN	57.7524	8.52222	9.65756	NaN	11.8136	8.79578	5.87982	1.89212	24.8416
28.73	95.5307	38.9062	34.9862	59.4661	68.1464	6.90214	98.1596	49.7958	49.019	11.3178	87.6271	10.132	82.0429	144.698	2.28875	2.47396	18.9335	21.6149	49.9691	141.018	52.775	40.0621	NaN	22.8606	75.7189	1.48681	34.7727	153.925	15.149	38.9113	4.57109	45.6839	10.8637	62.4629	8.59864	5.71667	7.55931	6.28492	46.238	1.64577	52.9794	14.4302	50.4478	NaN	41.2189	18.1662	35.8337	9.33051	118.831
29.615	88.2682	88.2682	2.30683	0.544322	1.89713	3.25663	3.9192	7.30977	0.487068	4.1107	0.336621	4.69803	1.57576	2.27399	2.01412	0.748073	NaN	5.26625	NaN	NaN	4.43752	7.14036	2.76807	NaN	5.99503	2.20158	NaN	1.73701	47.4176	0.545244	15.5261	1.03511	1.72348	5.7539	3.86118	7.09702	0.808919	4.44024	1.09847	2.41701	4.34859	0.751435	1.23548	2.25252	2.35612	6.1688	29.1059	0.35901	0.852728
29.745	98.8827	5.71161	2.7778	11.4472	6.7105	17.9168	37.3367	6.65917	24.3306	3.49191	32.5866	5.41527	10.4905	1.53578	6.55422	2.31271	31.0109	4.99215	50.6106	8.60038	15.5718	9.83194	3.41315	2.33273	4.7015	NaN	3.84886	66.7054	5.19566	78.6505	8.83679	4.47203	36.2855	32.2061	41.7432	7.92185	24.6963	7.53916	15.5684	21.5651	4.60128	6.97194	12.5423	11.4825	39.76	112.708	2.88658	3.59931	24.7553
VOCs with 80% for all skin VOCs
Different VOCs	27
up to 30 min
alpha
Nonparametric Comparisons With Control Using Steel Method
CONTROL = ACTIVE TB
no correction is needed
4 sig VOCs		NaN=0
[truncated: 393 more columns]

## Sheet: India
	VOCs with 80% for all skin VOCs
	Different VOCs	35
	up to 30 min
	alpha
	Nonparametric Comparisons With Control Using Steel Method
	CONTROL = ACTIVE TB
	no correction is needed
	3 sig VOCs		NaN=0
The values are before normalization to SA standard calibration.
'RT (min)'	'Percentage'	'HC_ASTHMA_TENAX_ARM_2081_71_mod'	'HC_ASTHMA_TENAX_ARM_2531_306_mod'	'HC_Bronchiatis_TENAX_ARM_2512_305_mod'	'HC_COPD_TENAX_ARM_2114_85_mod'	'HC_HBSAG_POSITIVE_TENAX_ARM_2083_86_mod'	'HC_NONTB_TENAX_ARM_2005_ID35_mod'	'HC_NONTB_TENAX_ARM_2016_ID42_mod'	'HC_NONTB_TENAX_ARM_2021_ID49_mod'	'HC_NONTB_TENAX_ARM_2045_ID46_mod'	'HC_NONTB_TENAX_ARM_2053_ID40_mod'	'HC_NONTB_TENAX_ARM_2060_64_mod'	'HC_NONTB_TENAX_ARM_2140_118_mod'	'HC_NONTB_TENAX_ARM_2145_109_mod'	'HC_NONTB_TENAX_ARM_2157_102_mod'	'HC_NONTB_TENAX_ARM_2162_116_mod'	'HC_NONTB_TENAX_ARM_2192_126_mod'	'HC_NONTB_TENAX_ARM_2198_129_mod'	'HC_NONTB_TENAX_ARM_2207_138_mod'	'HC_NONTB_TENAX_ARM_2209_140_mod'	'HC_NONTB_TENAX_ARM_2211_121_mod'	'HC_NONTB_TENAX_ARM_2221_145_mod'	'HC_NONTB_TENAX_ARM_2225_127_mod'	'HC_NONTB_TENAX_ARM_2228_143_mod'	'HC_NONTB_TENAX_ARM_2229_128_mod'	'HC_NONTB_TENAX_ARM_2233_130_mod'	'HC_NONTB_TENAX_ARM_2235_134_mod'	'HC_NONTB_TENAX_ARM_2238_137_mod'	'HC_NONTB_TENAX_ARM_2243_156_mod'	'HC_NONTB_TENAX_ARM_2245_167_mod'	'HC_NONTB_TENAX_ARM_2246_162_mod'	'HC_NONTB_TENAX_ARM_2247_164_mod'	'HC_NONTB_TENAX_ARM_2248_197_mod'	'HC_NONTB_TENAX_ARM_2263_159_mod'	'HC_NONTB_TENAX_ARM_2266_182_mod'	'HC_NONTB_TENAX_ARM_2274_172_mod'	'HC_NONTB_TENAX_ARM_2275_180_mod'	'HC_NONTB_TENAX_ARM_2289_179_mod'	'HC_NONTB_TENAX_ARM_2292_157_mod'	'HC_NONTB_TENAX_ARM_2321_181_mod'	'HC_NONTB_TENAX_ARM_2323_174_mod'	'HC_NONTB_TENAX_ARM_2331_176_mod'	'HC_NONTB_TENAX_ARM_2335_196_mod'	'HC_NONTB_TENAX_ARM_2351_202_mod'	'HC_NONTB_TENAX_ARM_2358_166_mod'	'HC_NONTB_TENAX_ARM_2367_276_mod'	'HC_NONTB_TENAX_ARM_2372_249_mod'	'HC_NONTB_TENAX_ARM_2374_255_mod'	'HC_NONTB_TENAX_ARM_2375_288_mod'
2.055	97.5265	3.76325	5.23869	5.88178	2.90205	2.67869	11.4913	4.51791	4.60346	7.70903	8.66446	1.93924	8.42422	3.59176	7.57538	3.28305	3.59817	26.2052	6.33569	5.54242	1.81917	2.23576	2.6136	12.1591	1.96343	1.99905	3.52708	1.81637	28.8416	5.38118	10.277	8.19943	10.5608	5.39529	5.31741	16.1102	28.8512	1.01758	3.61132	6.2943	9.13359	4.3946	5.01602	9.94958	3.47299	2.05455	16.8016	2.89054	8.20172
2.14	85.5124	8.95799	21.1419	16.8065	10.9185	32.0286	NaN	NaN	NaN	NaN	0.646599	13.17	NaN	NaN	21.0844	19.268	21.4692	NaN	28.8076	23.9421	15.2142	13.3698	17.0729	38.0399	22.1257	19.1275	22.9872	8.27315	NaN	25.2538	32.7034	33.744	38.1205	25.7235	29.1472	35.9272	NaN	10.7792	23.1283	34.5616	33.1401	12.0061	33.656	34.8772	14.1686	14.1744	9.94655	25.354	24.6623
2.71	99.6466	154.142	158.291	165.205	181.165	205.397	149.315	65.2179	87.341	127.992	174.837	182.86	117.256	44.1908	375.329	158.283	171.203	104.499	281.743	126.265	166.363	116.396	157.83	404.785	167.204	167.809	112.144	89.0301	213.146	197.665	319.383	335.287	302.773	291.2	317.08	253.816	122.542	137.492	186.092	287.759	295.749	153.315	175.628	213.462	138.477	149.425	166.954	187.601	123.128
2.73****	92.2261	56.8404	279.766	224.167	68.6491	229.741	19.2634	6.78172	7.491	19.182	34.7266	79.8104	NaN	NaN	251.094	134.137	157.291	NaN	282.05	216.273	94.7046	NaN	113.687	343.589	136.027	120.671	174.866	NaN	NaN	171.896	246.778	260.654	291.221	239.607	202.488	408.124	NaN	60.2377	152.295	255.701	281.567	84.8515	245.712	309.745	91.6799	161.995	72.4403	153.189	294.339
3.4	91.5194	4.06364	6.04898	3.87814	3.33379	10.7366	NaN	NaN	NaN	NaN	NaN	5.4819	61.521	25.0415	43.4256	6.51566	8.35338	10.5931	11.8582	12.6124	5.58254	3.86205	6.61454	16.6864	7.44993	7.24764	11.8052	6.76501	12.5261	15.7329	8.00607	14.1814	12.4665	13.6834	8.18784	29.2847	19.8385	4.96363	7.52685	11.3574	13.4277	3.80276	13.1974	14.0266	6.595	2.51898	1.78774	2.98619	6.08819
4.475	98.2332	102.242	93.7425	71.9169	202.907	131.119	18.2443	1.14975	3.39661	9.15352	24.5583	76.9568	1.22345	NaN	98.8534	93.2962	138.502	4.04276	231.339	108.762	110.228	106.422	150.021	212.055	120.654	127.52	54.3388	70.486	2.30698	186.696	115.83	85.2766	196.825	141.209	68.8781	89.0204	2.08949	66.8522	73.5225	163.75	140.409	45.0497	270.177	222.524	94.063	97.0268	61.5652	91.4629	101.637
5.42	82.3322	NaN	3.83861	2.74391	1.96585	7.42987	NaN	NaN	NaN	NaN	NaN	3.19771	NaN	NaN	24.1585	4.33915	9.8591	0.878585	8.47523	13.2277	3.69904	4.90683	5.56574	10.2646	7.76936	5.80344	9.00507	0.919271	NaN	6.30579	3.04497	2.154	6.82305	NaN	2.81156	13.9632	NaN	2.03872	3.08871	4.04796	9.49681	2.66368	4.69808	5.2154	1.95503	2.32039	2.52599	1.54039	4.78652
7.975	98.9399	36.2025	72.2179	37.3368	48.4347	126.332	2.69116	NaN	0.942849	1.75768	5.60771	45.5273	1.52099	0.753481	331.73	52.1271	77.9121	4.92698	127.105	116.9	49.7071	35.6695	70.2343	123.94	62.5417	67.1107	83.8485	38.8135	3.96726	87.2684	60.1878	56.4544	84.9577	67.5945	54.9426	130.895	3.23055	29.2326	33.7468	85.1858	89.169	20.2283	93.231	105.636	37.6815	37.1357	23.6577	66.0688	51.0402
8.645	89.0459	3.49373	11.0513	5.00941	2.64681	7.04459	NaN	NaN	NaN	NaN	NaN	3.54384	1.0976	NaN	25.8043	4.74441	19.3202	0.584771	9.53923	10.9664	4.26481	12.0998	6.78242	12.0019	7.31116	7.519	16.0637	1.71022	0.461605	7.8844	4.49926	4.4082	9.60981	32.8104	3.78106	23.4058	NaN	2.63279	5.16234	6.03334	14.5053	6.68679	8.3972	7.09043	2.76121	3.81767	3.08217	5.60414	6.39843
9.42	91.5194	2.16286	4.71892	1.97436	0.852869	3.41272	NaN	NaN	0.562691	NaN	3.3227	2.143	NaN	NaN	9.42282	1.32631	2.24127	NaN	2.57499	3.89843	1.30619	1.15265	1.86603	3.36613	1.97544	1.97459	2.49912	0.290118	NaN	2.74122	1.62156	2.11478	2.65978	2.65198	2.11159	6.30626	NaN	0.825864	1.50216	2.73702	3.03898	0.674873	1.87031	2.92894	1.98597	2.64703	0.918361	1.77476	3.98444
9.82	78.4452	0.383489	0.779945	0.245664	0.265377	0.995096	NaN	NaN	NaN	NaN	NaN	0.493386	NaN	NaN	0.98243	0.818322	1.16587	NaN	1.17061	1.98725	0.577152	0.419722	0.838391	1.40133	0.91865	0.944774	1.37901	1.02772	NaN	0.883086	0.357779	0.425426	0.961034	0.839754	0.429509	4.34178	NaN	0.264088	0.48235	0.538128	3.86805	0.291739	0.52638	0.743582	0.24344	0.287534	0.329631	0.295204	0.352693
10.11	84.4523	1.22199	2.48626	0.937729	0.801529	2.22707	NaN	NaN	NaN	NaN	NaN	1.45263	NaN	NaN	12.579	1.67968	2.9796	NaN	3.76622	4.76714	1.90897	0.742353	2.6413	4.42154	2.46099	2.82734	2.8863	1.21993	NaN	2.68474	1.52868	2.46656	4.61319	3.34406	1.73683	10.2503	NaN	0.681017	1.39413	2.98245	2.54148	0.753998	3.4619	2.4583	0.911996	0.993952	0.503496	0.737353	1.78223
10.415	99.6466	25.1143	29.9005	15.1165	18.6228	44.3004	6.38376	1.05891	3.05895	7.36642	8.32705	29.7876	0.494198	0.20361	74.8094	31.2836	56.8577	1.36064	94.71	79.3651	37.2564	22.6547	53.389	100.089	44.9503	51.2664	59.168	24.3143	2.2092	42.6845	46.4149	39.0456	45.0176	50.1835	27.301	98.0033	0.925916	11.6901	18.3702	44.6473	49.5839	9.25283	47.2677	43.3159	15.861	11.1907	7.19369	13.9923	15.2022
10.605	97.1731	18.4493	20.9011	10.3393	13.5623	30.1721	1.00489	NAN	0.908943	1.49191	3.07346	21.7898	0.476445	0.218502	172.192	22.0994	43.5663	1.22322	0.540681	60.8134	28.2818	16.2382	42.8775	73.9983	33.9664	39.7202	45.4545	19.3126	3.76953	29.2456	41.7235	22.546	29.3538	29.8301	16.1309	69.5955	0.734055	8.50703	11.6804	27.535	41.5686	5.6119	0.129105	29.0891	10.6544	8.324	4.24746	10.1086	9.85444
11.78	78.0919	0.558804	0.544867	0.22989	0.289778	0.790462	NaN	NaN	NaN	NaN	NaN	0.654685	NaN	NaN	5.27331	0.815648	1.34225	NaN	1.64607	1.89709	0.753986	0.444994	1.16841	1.88373	1.03805	1.2512	1.24704	NaN	NaN	1.37834	0.622486	0.748868	1.49556	1.27322	0.713948	11.644	NaN	0.422955	0.552866	1.05877	9.30253	1.05877	1.03901	1.37617	0.428316	0.299849	0.276534	0.303318	0.618887
11.87	89.3993	2.52958	2.74312	1.61148	1.79202	4.67939	NaN	NaN	NaN	NaN	NaN	2.63614	0.298751	NaN	23.7682	3.5943	5.09205	0.254759	7.22203	8.09178	2.95782	1.80995	4.13427	8.25981	3.99031	3.97849	5.47772	1.45702	0.203036	4.58564	2.84976	3.5384	5.20344	4.61238	3.35252	NaN	NaN	1.1782	1.87362	4.25143	NaN	1.01693	3.8478	4.17641	2.02314	1.19674	1.12659	1.48795	3.484
12.335	84.4523	1.47781	8.71794	4.29321	1.48909	2.86787	0.466774	NaN	NaN	NaN	NaN	1.98735	5.45045	2.82249	10.6253	NaN	1.72959	NaN	3.18678	2.76566	1.48543	1.05109	NaN	3.26156	1.54953	1.3547	1.92411	NaN	6.38929	5.42727	3.58926	2.4034	5.57091	3.86665	2.84767	9.50696	3.72617	1.33659	1.52118	5.60831	NaN	1.25953	4.88597	6.07977	1.66399	2.44194	1.66522	3.10313	6.24768
12.71	96.4664	7.40269	3.11936	1.37096	4.80987	9.2818	5.72694	NaN	1.68525	5.12214	6.19705	7.20059	1.36804	0.518736	71.6334	6.42511	6.5684	0.266986	13.869	9.81679	5.20243	2.66114	0.285568	13.0927	5.1896	6.40432	8.04923	3.30384	NaN	6.95921	7.04739	5.45991	6.05207	7.94111	3.9156	25.2485	NaN	1.39422	2.46479	5.72472	10.8396	1.07238	5.96623	9.11114	2.47484	1.59016	1.17905	1.6399	3.35084
13.05	91.5194	24.0459	NaN	NaN	13.4199	21.994	9.77093	6.16588	4.25178	7.73872	12.3935	17.6446	5.45045	2.82249	74.7497	9.51288	25.1351	8.27453	58.7793	24.8177	21.5457	15.7824	26.5595	63.0756	31.4886	21.4708	NaN	NaN	6.38929	57.1235	41.2739	28.5571	54.0608	53.5289	29.2749	139.914	3.72617	15.1401	17.6318	51.4398	53.2923	10.1571	66.1137	70.688	19.3928	16.5839	18.8543	16.0168	30.5969
13.245	91.8728	8.41526	5.28948	2.62496	2.02987	4.61705	NaN	1.24799	1.24245	1.75677	5.68896	6.53725	1.323	0.310087	70.4926	4.68991	10.9511	0.711736	16.3732	10.9595	7.54285	5.1018	12.337	17.1745	7.68372	10.3167	9.2188	NaN	1.127	15.1924	8.9129	9.43182	16.9755	NaN	9.15777	102.177	1.13929	3.64306	4.70748	16.1518	52.2034	3.74418	19.0242	18.2626	5.24373	2.26435	1.40061	3.00343	6.51617
13.48	93.2862	4.74439	2.85058	1.414	2.46682	4.42928	1.07148	NaN	NaN	NaN	1.82404	4.89455	0.500022	0.149607	55.015	4.11796	7.57447	0.356571	12.7637	8.83527	5.83699	2.31534	7.56425	12.2602	5.51069	6.97483	7.67984	3.24789	0.738962	10.3969	7.52008	6.63175	8.95834	8.94988	7.08597	23.6471	0.490188	2.73667	2.89608	9.17206	11.5367	1.68129	9.42208	12.4567	3.03568	1.56727	1.37525	2.6021	2.93915
13.485	95.7597	3.75338	3.7351	2.19134	1.29578	3.59071	NaN	1.63945	1.56688	2.26811	5.4371	3.23216	NaN	NaN	21.548	1.80881	4.22921	0.216968	7.06093	5.35341	3.09164	2.66982	4.496	7.0018	3.2812	4.23348	3.60744	0.392453	0.237384	6.57774	4.0939	3.61954	6.84797	4.79486	4.20639	22.2997	0.149101	1.43148	2.01319	6.85708	11.3886	1.19929	8.16864	8.83715	2.79165	1.86379	1.08386	3.00416	5.17839
14.965	87.6325	15.0671	6.42982	6.53066	7.39664	6.06743	4.42219	0.590198	1.35097	1.16588	1.1297	7.81396	20.9278	5.26978	NaN	55.1541	7.62671	27.2025	13.7642	5.85193	1.94197	5.23381	3.77636	NaN	4.016	3.21939	3.50669	1.83917	11.1619	0.457562	2.05736	NaN	3.34568	4.56409	NaN	32.1221	4.33029	1.04126	2.00726	NaN	NaN	12.9075	NaN	4.97289	2.22516	NaN	1.51479	8.45943	1.30207
15.625	91.5194	4.60351	6.8412	4.68169	NaN	1.23827	NaN	NaN	1.20135	NaN	NaN	3.22017	NaN	0.820322	80.4782	4.74238	8.07493	0.973199	11.2502	7.41451	5.04414	3.43882	8.89932	9.9735	5.79949	7.39842	6.90553	0.613708	3.24468	16.2751	7.30156	7.45904	15.7565	11.0783	9.45764	103.684	2.55615	3.38364	3.87773	14.4725	25.2471	7.01211	17.6819	15.9853	6.83008	1.62256	3.00318	3.17909	4.41598
15.805	92.5795	13.857	18.903	6.72509	4.97532	11.2594	0.706733	NaN	NaN	0.899579	0.825106	12.5068	3.92861	1.37026	65.5134	12.4667	17.3298	2.1606	21.293	17.2972	9.39318	5.51272	19.3545	21.8647	10.3572	16.9904	16.3613	4.8859	NaN	12.1329	9.58307	8.5513	10.9515	13.847	6.44788	87.2831	NaN	6.14054	3.60524	9.85809	14.2775	4.5497	11.1201	10.2004	4.27859	2.52327	1.40726	2.99932	6.35573
16.03	80.5654	1.10171	0.808253	0.33851	NaN	0.592073	NaN	NaN	NaN	NaN	NaN	0.853542	0.64138	NaN	8.06122	0.798286	3.42202	NaN	2.15492	1.44759	0.929978	NaN	1.76496	2.2545	1.10692	1.59489	2.10771	NaN	3.73246	1.59751	0.958915	0.919784	2.38663	7.91906	1.3702	18.7246	0.424098	0.683118	0.572779	2.11918	3.93757	2.8078	2.62936	1.87395	0.49559	0.284641	0.345355	0.310101	0.730299
16.63	89.3993	1.3027	0.994768	1.41397	0.459059	1.47411	NaN	NaN	NaN	NaN	NaN	0.79676	0.840421	0.353967	7.55818	0.181841	2.66861	0.102051	3.91492	2.31879	1.6585	1.64749	2.6865	3.90651	2.51676	2.20398	0.792214	0.206448	0.576947	1.75541	1.57453	1.54455	1.898	1.41469	1.11386	4.82292	1.03813	0.525277	0.970375	1.65825	1.65387	1.62937	3.86786	3.17533	0.549981	0.876369	0.406384	0.277388	0.923791
18.01	90.106	1.6118	2.43729	4.01711	0.782432	0.950963	NaN	NaN	0.511022	NaN	NaN	1.03222	7.29643	1.76475	23.0787	1.56356	5.65158	1.60174	6.19261	4.26776	2.02786	2.53075	3.42567	7.7088	6.73826	3.65446	4.16416	NaN	6.39299	4.1094	3.64862	8.08162	22.7056	8.75342	10.7348	31.5401	8.5504	3.21022	3.81724	10.2988	4.78295	22.4367	26.574	8.93351	1.65764	0.878555	1.98988	2.25321	2.38865
20.035	91.8728	2.02787	3.07608	0.149154	0.245481	2.03185	NaN	NaN	0.52344	NaN	NaN	1.47634	1.99207	0.572184	8.43383	0.146954	7.1722	0.224173	10.6395	7.14223	3.91035	3.24887	5.97873	11.2407	6.38952	6.51759	1.38602	0.622127	5.4295	5.54012	5.51688	5.33196	6.72458	4.46777	2.75016	4.91813	7.69634	1.59043	2.66521	4.88647	5.0704	8.20517	14.7901	9.57873	1.82428	1.68706	1.17867	1.87633	1.83241
20.85	90.106	1.83634	2.23056	2.58774	0.238278	2.00701	NaN	NaN	NaN	NaN	NaN	1.38067	6.58801	1.99521	12.2696	0.187282	5.49394	0.724838	8.30098	5.17879	2.99661	2.68176	4.37026	13.1481	4.61901	4.9742	3.37865	0.498597	7.01875	4.89452	0.172725	10.2851	5.03315	7.97545	2.44824	7.94415	7.32481	1.21001	4.05334	3.75184	4.22099	7.40076	10.8433	7.63247	1.49369	1.18759	1.01481	1.44687	1.62661
21.52	84.0989	1.00764	0.513963	3.82954	0.699963	0.687539	NaN	NaN	NaN	NaN	NaN	0.471788	6.82678	1.19891	4.75657	0.428568	5.62425	2.47296	NaN	0.81943	0.547671	1.55089	1.59575	6.10099	8.28282	1.72426	1.78377	NaN	4.32026	0.909475	3.71589	2.7552	3.21857	6.34524	3.48331	21.08	6.44888	0.606157	1.15575	2.12058	2.46012	4.69329	7.58307	2.45261	0.39409	0.268172	1.65431	NaN	0.665933
24.165	87.6325	2.21865	0.878508	1.63681	0.318156	1.26236	NaN	NaN	NaN	NaN	NaN	1.09605	6.78619	1.70965	6.41806	NaN	4.62613	2.06964	7.95914	5.73815	1.2112	1.95779	1.71679	5.48156	2.36677	1.83315	2.36532	0.360081	2.59705	2.2871	3.77484	6.13693	3.27009	1.92042	5.28495	9.86461	2.21786	0.697147	1.93813	2.15492	2.50443	9.77324	3.73113	4.32878	0.81118	0.442486	0.822859	1.89108	0.901934
24.435	85.8657	1.06088	0.539664	1.23187	0.309363	0.224719	NaN	2.73076	NaN	NaN	NaN	0.225167	2.06735	0.23844	1.18505	0.302029	2.61216	0.84023	0.596719	0.28871	0.208059	0.426828	0.528614	4.03131	4.32006	1.11616	0.581537	NaN	1.91609	0.771424	2.53366	1.42236	2.27256	2.59052	2.15755	5.67849	1.79609	0.271848	0.558222	0.948579	1.60916	4.30552	1.15474	1.34738	0.170116	0.0461532	1.18689	NaN	NaN
26.885	98.2332	9.41573	7.66332	0.278464	7.0839	11.1982	2.04568	3.31337	3.06471	5.17552	4.15076	7.1576	9.99972	0.65929	4.04179	4.2238	14.4839	4.052	29.2879	10.7471	9.87952	10.2724	11.6367	31.4649	13.4365	14.9231	1.68433	7.1414	7.99423	23.2244	26.754	23.519	29.1957	21.7846	30.6866	11.7677	5.54991	3.662	5.47914	25.9331	26.9935	37.5084	33.2954	29.9434	6.70391	2.71275	6.62594	5.62811	6.76383
28.08	80.5654	2.17937	0.627224	0.662308	0.288211	0.24859	NaN	NaN	NaN	NaN	NaN	0.284539	0.719405	0.385135	NaN	0.691471	1.99444	1.14387	1.03812	0.267515	0.323008	0.282272	0.649538	1.95817	1.69808	0.519114	0.744227	NaN	2.77372	2.0097	1.17737	2.00239	4.05627	1.22184	3.1922	2.51118	2.13405	0.719411	0.829407	2.70707	1.83667	9.35885	1.57516	1.91033	0.307895	0.174141	NaN	1.57	0.384829
FILE	'Percentage'	'HC_ASTHMA_TENAX_ARM_2081_71_mod'	'HC_ASTHMA_TENAX_ARM_2531_306_mod'	'HC_Bronchiatis_TENAX_ARM_2512_305_mod'	'HC_COPD_TENAX_ARM_2114_85_mod'	'HC_HBSAG_POSITIVE_TENAX_ARM_2083_86_mod'	'HC_NONTB_TENAX_ARM_2005_ID35_mod'	'HC_NONTB_TENAX_ARM_2016_ID42_mod'	'HC_NONTB_TENAX_ARM_2021_ID49_mod'	'HC_NONTB_TENAX_ARM_2045_ID46_mod'	'HC_NONTB_TENAX_ARM_2053_ID40_mod'	'HC_NONTB_TENAX_ARM_2060_64_mod'	'HC_NONTB_TENAX_ARM_2140_118_mod'	'HC_NONTB_TENAX_ARM_2145_109_mod'	'HC_NONTB_TENAX_ARM_2157_102_mod'	'HC_NONTB_TENAX_ARM_2162_116_mod'	'HC_NONTB_TENAX_ARM_2192_126_mod'	'HC_NONTB_TENAX_ARM_2198_129_mod'	'HC_NONTB_TENAX_ARM_2207_138_mod'	'HC_NONTB_TENAX_ARM_2209_140_mod'	'HC_NONTB_TENAX_ARM_2211_121_mod'	'HC_NONTB_TENAX_ARM_2225_127_mod'	'HC_NONTB_TENAX_ARM_2228_143_mod'	'HC_NONTB_TENAX_ARM_2229_128_mod'	'HC_NONTB_TENAX_ARM_2233_130_mod'	'HC_NONTB_TENAX_ARM_2235_134_mod'	'HC_NONTB_TENAX_ARM_2243_156_mod'	'HC_NONTB_TENAX_ARM_2245_167_mod'	'HC_NONTB_TENAX_ARM_2246_162_mod'	'HC_NONTB_TENAX_ARM_2247_164_mod'	'HC_NONTB_TENAX_ARM_2248_197_mod'	'HC_NONTB_TENAX_ARM_2263_159_mod'	'HC_NONTB_TENAX_ARM_2266_182_mod'	'HC_NONTB_TENAX_ARM_2274_172_mod'	'HC_NONTB_TENAX_ARM_2275_180_mod'	'HC_NONTB_TENAX_ARM_2289_179_mod'	'HC_NONTB_TENAX_ARM_2292_157_mod'	'HC_NONTB_TENAX_ARM_2321_181_mod'	'HC_NONTB_TENAX_ARM_2323_174_mod'	'HC_NONTB_TENAX_ARM_2331_176_mod'	'HC_NONTB_TENAX_ARM_2335_196_mod'	'HC_NONTB_TENAX_ARM_2351_202_mod'	'HC_NONTB_TENAX_ARM_2358_166_mod'	'HC_NONTB_TENAX_ARM_2367_276_mod'	'HC_NONTB_TENAX_ARM_2372_249_mod'	'HC_NONTB_TENAX_ARM_2374_255_mod'	'HC_NONTB_TENAX_ARM_2375_288_mod'	'HC_NONTB_TENAX_ARM_2378_285_mod'	'HC_NONTB_TENAX_ARM_2389_271_mod'
2.73	92.5795	56.8404	279.766	224.167	68.6491	229.741	19.2634	6.78172	7.491	19.182	34.7266	79.8104	NaN	NaN	251.094	134.137	157.291	NaN	282.05	216.273	94.7046	113.687	343.589	136.027	120.671	174.866	NaN	171.896	246.778	260.654	291.221	239.607	202.488	408.124	NaN	60.2377	152.295	255.701	281.567	84.8515	245.712	309.745	91.6799	161.995	72.4403	153.189	294.339	168.003	180.156
[truncated: 427 more columns]
